# Supplementary material for: Spectral tissue sensing to identify intra- and extravascular needle placement — A randomized single-blind controlled trial
Source: PubMed Central journal article supplement (PMC5344374; doi:10.1371/journal.pone.0172662), 2017-03-09
Supplement: pone.0172662.s004.pdf [file pone.0172662.s004.pdf]

| Volunteer | Location | Position | B     |
|-----------|----------|----------|-------|
| 1         | 1        | S        | 2     |
| 1         | 2        | V        | 1501  |
| 2         | 1        | S        | 1     |
| 2         | 2        | S        | 1     |
| 3         | 1        | S        | 0     |
| 3         | 2        | S        | 5     |
| 4         | 1        | S        | 3     |
| 4         | 2        | V        | 28586 |
| 5         | 1        | S        | 5     |
| 5         | 2        | S        | 12    |
| 6         | 1        | S        | 4     |
| 6         | 2        | V        | 1416  |
| 7         | 1        | S        | 2     |
| 7         | 2        | V        | 382   |
| 8         | 1        | S        | 2     |
| 8         | 2        | S        | 2     |
| 9         | 1        | S        | 2     |
| 9         | 2        | S        | 1     |
| 10        | 1        | S        | 1     |
| 10        | 2        | S        | 8     |
| 11        | 1        | S        | 2     |
| 11        | 2        | S        | 8     |
| 12        | 1        | S        | 2     |
| 12        | 2        | V        | 1664  |
| 13        | 1        | S        | 0     |
| 13        | 2        | V        | 2     |
| 15        | 1        | S        | 2     |
| 15        | 2        | S        | 4     |
| 16        | 1        | S        | 0     |
| 16        | 2        | V        | 2915  |
| 17        | 1        | S        | 0     |
| 17        | 2        | S        | 0     |
| 18        | 1        | S        | 3     |
| 18        | 2        | S        | 1     |
| 19        | 1        | S        | 1     |
| 19        | 2        | V        | 1     |
| 20        | 1        | S        | 1     |
| 20        | 2        | S        | 1     |
